# Supplementary material for: Air-liquid interface culture promotes maturation and allows environmental exposure of pluripotent stem cell–derived alveolar epithelium
Source: JCI journal article supplement (doi:10.1172/jci.insight.155589), 2022-03-21
Supplement: sd1 [file 1]

You are being redirected.
